# Supplementary material for: Crustal structures beneath the Eastern and Southern Alps from ambient noise tomography
Source: Copernicus journal article supplement (doi:10.5194/se-11-1947-2020), 2020-10-29
Supplement: Supplementary file 3 [file se-11-1947-2020-supplement.zip]

| Period (sec) | 1    | 2    | 3    | 4    | 5    | 6    | 7    | 8    | 9    | 10   |
|--------------|------|------|------|------|------|------|------|------|------|------|
| Rayleigh     | 2851 | 2944 | 2948 | 2947 | 2944 | 2954 | 2958 | 2953 | 2925 | 2859 |
| Love         | 2960 | 2951 | 2956 | 2939 | 2932 | 2938 | 2937 | 2936 | 2929 | 2869 |

| Period (sec) | 11   | 12   | 13   | 14   | 15   | 16   | 17   | 18   | 19   | 20   |
|--------------|------|------|------|------|------|------|------|------|------|------|
| Rayleigh     | 2762 | 2586 | 2358 | 2128 | 1858 | 1636 | 1447 | 1341 | 1258 | 1151 |
| Love         | 2767 | 2565 | 2305 | 2076 | 1853 | 1662 | 1539 | 1446 | 1344 | 1264 |

| Period (sec) | 21   | 22   | 23  | 24  | 25  | 26  | 27  | 28  | 29  | 30  |
|--------------|------|------|-----|-----|-----|-----|-----|-----|-----|-----|
| Rayleigh     | 1066 | 963  | 876 | 812 | 759 | 724 | 704 | 692 | 685 | 686 |
| Love         | 1147 | 1054 | 975 | 918 | 873 | 850 | 840 | 832 | 826 | 825 |

| Period (sec) | 31  | 32  | 33  | 34  | 35  | 36  | 37  | 38  | 39  | 40  |
|--------------|-----|-----|-----|-----|-----|-----|-----|-----|-----|-----|
| Rayleigh     | 681 | 678 | 674 | 668 | 668 | 662 | 660 | 656 | 645 | 639 |
| Love         | 833 | 832 | 829 | 824 | 816 | 812 | 809 | 812 | 807 | 802 |

| Period (sec) | 41  | 42  | 43  | 44  | 45  | 46  | 47  | 48  | 49  | 50  |
|--------------|-----|-----|-----|-----|-----|-----|-----|-----|-----|-----|
| Rayleigh     | 630 | 621 | 617 | 617 | 617 | 617 | 617 | 617 | 617 | 617 |
| Love         | 799 | 796 | 796 | 796 | 794 | 794 | 794 | 794 | 784 | 784 |

Table S1. Number of velocity measurements for each period and for Rayleigh and Love wave, selected after applying a number of criteria explained in section 3.
