# Supplementary material for: Crustal structures beneath the Eastern and Southern Alps from ambient noise tomography
Source: Copernicus journal article supplement (doi:10.5194/se-11-1947-2020), 2020-10-29
Supplement: Supplementary file 4 [file se-11-1947-2020-supplement.zip]

| Period (sec) | Rayleigh wave               |                                 | Love wave                   |                                 |
|--------------|-----------------------------|---------------------------------|-----------------------------|---------------------------------|
|              | Damping factor ( $\alpha$ ) | Correlation length ( $\sigma$ ) | Damping factor ( $\alpha$ ) | Correlation length ( $\sigma$ ) |
| 1 to 7       | 44                          | 26                              | 46                          | 20                              |
| 8 to 15      | 46                          | 28                              | 46                          | 20                              |
| 16 to 25     | 48                          | 28                              | 48                          | 24                              |
| 26 to 35     | 48                          | 32                              | 48                          | 26                              |
| 36 to 50     | 50                          | 34                              | 50                          | 26                              |

Table S2. Values selected for damping factor ( $\alpha$ ) and correlation length ( $\sigma$ ) in km for each period rang during the group velocity inversion.
