# Supplementary material for: Crustal structures beneath the Eastern and Southern Alps from ambient noise tomography
Source: Copernicus journal article supplement (doi:10.5194/se-11-1947-2020), 2020-10-29
Supplement: Supplementary file 6 [file se-11-1947-2020-supplement.zip]

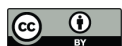

## *Supplement of*

# **Crustal structures beneath the Eastern and Southern Alps from ambient noise tomography**

**Ehsan Qorbani et al.**

*Correspondence to:* Ehsan Qorbani ([ehsan.qorbani@univie.ac.at](mailto:ehsan.qorbani@univie.ac.at))

- se-11-1947-2020-supplement-title-page.pdf
- FigureS1.png
- FigureS3.png
- FigureS5.png
- Figure\_S2.png
- Figure\_S4.pdf
- Supplementary Figures caption.docx
- Table\_S1.pdf
- Table\_S2.pdf
- \_\_MACOSX
  - .\_FigureS1.png
  - .\_FigureS3.png
  - .\_FigureS5.png
  - .\_Figure\_S4.pdf
  - .\_Supplementary Figures caption.docx
  - .\_Table\_S1.pdf
  - .\_Table\_S2.pdf

The copyright of individual parts of the supplement might differ from the CC BY 4.0 License.
